# Supplementary material for: Maternal serine supply from late pregnancy to lactation improves offspring performance through modulation of metabolic pathways
Source: Royal Society of Chemistry journal article supplement (doi:10.1039/d0fo01594f), 2020-01-01
Supplement: d0fo01594f1.pdf [file d0fo01594f1.pdf]

**Supplemental Table 1. The hyperlink information of metabolites that differed in serum of sows at 24 hours postpartum and day 11 of lactation between CON and L-Ser groups**

| Metabolites                                   | URL-Info                                                                                                                                                                                                            |
|-----------------------------------------------|---------------------------------------------------------------------------------------------------------------------------------------------------------------------------------------------------------------------|
| 4,7,10,13,16,19-Docosahexaenoate              | <a href="http://www.kegg.jp/kegg-bin/show_pathway?map01040+C06429+C00219">http://www.kegg.jp/kegg-bin/show_pathway?map01040+C06429+C00219</a>                                                                       |
| Arachidonate                                  | <a href="http://www.kegg.jp/kegg-bin/show_pathway?map01040+C08320+C08323+C00219+C08316+C06426+C01595+C00712">http://www.kegg.jp/kegg-bin/show_pathway?map01040+C08320+C08323+C00219+C08316+C06426+C01595+C00712</a> |
| Anthranilate                                  | <a href="http://www.kegg.jp/kegg-bin/show_pathway?map00380+C00108">http://www.kegg.jp/kegg-bin/show_pathway?map00380+C00108</a>                                                                                     |
| Sphingomyelin (d18:1/18:0)                    | <a href="http://www.kegg.jp/kegg-bin/show_pathway?map00600+C00550">http://www.kegg.jp/kegg-bin/show_pathway?map00600+C00550</a>                                                                                     |
| 1,2-dioleoyl-sn-glycero-3-phosphatidylcholine | -                                                                                                                                                                                                                   |
| L-Citrulline                                  | <a href="http://www.kegg.jp/kegg-bin/show_pathway?map00220+C00062+C00064+C00437+C00025+C00327">http://www.kegg.jp/kegg-bin/show_pathway?map00220+C00062+C00064+C00437+C00025+C00327</a>                             |
| Taurodeoxycholate                             | -                                                                                                                                                                                                                   |
| Linolenate                                    | <a href="http://www.kegg.jp/kegg-bin/show_pathway?map01040+C08320+C08323+C00219+C08316+C06426+C01595+C00712">http://www.kegg.jp/kegg-bin/show_pathway?map01040+C08320+C08323+C00219+C08316+C06426+C01595+C00712</a> |
| Trans-Vaccenate                               | -                                                                                                                                                                                                                   |

**Supplemental Table 2. The hyperlink information of metabolites that differed in colostrum of sows at 24 hours postpartum and day 11 of lactation between CON and L-**

**Ser group**

| Metabolites                       | URL-Info                                                                                                                                                                                                                          |
|-----------------------------------|-----------------------------------------------------------------------------------------------------------------------------------------------------------------------------------------------------------------------------------|
| L-Glutamine                       | <a href="http://www.kegg.jp/kegg-bin/show_pathway?map00230+C00064+C00262">http://www.kegg.jp/kegg-bin/show_pathway?map00230+C00064+C00262</a>                                                                                     |
| Hypoxanthine                      | <a href="http://www.kegg.jp/kegg-bin/show_pathway?map00230+C00064+C00262">http://www.kegg.jp/kegg-bin/show_pathway?map00230+C00064+C00262</a>                                                                                     |
| Nicotinamide adenine dinucleotide | <a href="http://www.kegg.jp/kegg-bin/show_pathway?map00760+C00003+C00111+C00253">http://www.kegg.jp/kegg-bin/show_pathway?map00760+C00003+C00111+C00253</a>                                                                       |
| Nicotinate                        | <a href="http://www.kegg.jp/kegg-bin/show_pathway?map00760+C00003+C00111+C00253">http://www.kegg.jp/kegg-bin/show_pathway?map00760+C00003+C00111+C00253</a>                                                                       |
| L-Pyroglutamate                   | <a href="http://www.kegg.jp/kegg-bin/show_pathway?map00480+C00025+C01879">http://www.kegg.jp/kegg-bin/show_pathway?map00480+C00025+C01879</a>                                                                                     |
| L-Glutamate                       | <a href="http://www.kegg.jp/kegg-bin/show_pathway?map04974+C00078+C00025+C00041+C00079+C00064+C00082+C00483">http://www.kegg.jp/kegg-bin/show_pathway?map04974+C00078+C00025+C00041+C00079+C00064+C00082+C00483</a>               |
| cis-9-Palmitoleate                | <a href="http://www.kegg.jp/kegg-bin/show_pathway?map00061+C00249+C06424+C08362">http://www.kegg.jp/kegg-bin/show_pathway?map00061+C00249+C06424+C08362</a>                                                                       |
| Eicosapentaenoate                 | <a href="http://www.kegg.jp/kegg-bin/show_pathway?map01040+C00249+C06428+C06427+C00219+C01595">http://www.kegg.jp/kegg-bin/show_pathway?map01040+C00249+C06428+C06427+C00219+C01595</a>                                           |
| alpha-Linolenate                  | <a href="http://www.kegg.jp/kegg-bin/show_pathway?map01040+C00249+C06428+C06427+C00219+C01595">http://www.kegg.jp/kegg-bin/show_pathway?map01040+C00249+C06428+C06427+C00219+C01595</a>                                           |
| Taurine                           | <a href="http://www.kegg.jp/kegg-bin/show_pathway?map00920+C00245">http://www.kegg.jp/kegg-bin/show_pathway?map00920+C00245</a>                                                                                                   |
| Pantothenate                      | <a href="http://www.kegg.jp/kegg-bin/show_pathway?map00770+C00864+C00106">http://www.kegg.jp/kegg-bin/show_pathway?map00770+C00864+C00106</a>                                                                                     |
| Betaine                           | <a href="http://www.kegg.jp/kegg-bin/show_pathway?map00260+C00078+C00719">http://www.kegg.jp/kegg-bin/show_pathway?map00260+C00078+C00719</a>                                                                                     |
| D-Proline                         | <a href="http://www.kegg.jp/kegg-bin/show_pathway?map00330+C00025+C00763+C00791">http://www.kegg.jp/kegg-bin/show_pathway?map00330+C00025+C00763+C00791</a>                                                                       |
| D-(+)-Melibiose                   | <a href="http://www.kegg.jp/kegg-bin/show_pathway?map00052+C00111+C00137+C00029+C00116+C00052+C01613+C05402+C00243">http://www.kegg.jp/kegg-bin/show_pathway?map00052+C00111+C00137+C00029+C00116+C00052+C01613+C05402+C00243</a> |
| Stachyose                         | <a href="http://www.kegg.jp/kegg-bin/show_pathway?map00052+C00111+C00137+C00029+C00116+C00052+C01613+C05402+C00243">http://www.kegg.jp/kegg-bin/show_pathway?map00052+C00111+C00137+C00029+C00116+C00052+C01613+C05402+C00243</a> |
| L-Carnitine                       | <a href="http://www.kegg.jp/kegg-bin/show_pathway?map04976+C00318+C02528">http://www.kegg.jp/kegg-bin/show_pathway?map04976+C00318+C02528</a>                                                                                     |
| Uridine 5'-monophosphate (UMP)    | <a href="http://www.kegg.jp/kegg-bin/show_pathway?map00240+C00105+C00029+C00106+C00064+C00178+C00015">http://www.kegg.jp/kegg-bin/show_pathway?map00240+C00105+C00029+C00106+C00064+C00178+C00015</a>                             |
| Uridine 5'-diphosphate (UDP)      | <a href="http://www.kegg.jp/kegg-bin/show_pathway?map00240+C00105+C00029+C00106+C00064+C00178+C00015">http://www.kegg.jp/kegg-bin/show_pathway?map00240+C00105+C00029+C00106+C00064+C00178+C00015</a>                             |
| Arachidonate                      | <a href="http://www.kegg.jp/kegg-bin/show_pathway?map01040+C00249+C06428+C06427+C00219+C01595">http://www.kegg.jp/kegg-bin/show_pathway?map01040+C00249+C06428+C06427+C00219+C01595</a>                                           |
| sn-Glycerol 3-phosphoethanolamine | <a href="http://www.kegg.jp/kegg-bin/show_pathway?map00564+C00111+C01233+C00588+C00157+C00670">http://www.kegg.jp/kegg-bin/show_pathway?map00564+C00111+C01233+C00588+C00157+C00670</a>                                           |
| Citrate                           | <a href="http://www.kegg.jp/kegg-bin/show_pathway?map00250+C00158+C00064+C00025">http://www.kegg.jp/kegg-bin/show_pathway?map00250+C00158+C00064+C00025</a>                                                                       |
| myo-Inositol                      | <a href="http://www.kegg.jp/kegg-bin/show_pathway?map00052+C00111+C00137+C00029+C00116+C00052+C01613+C05402+C00243">http://www.kegg.jp/kegg-bin/show_pathway?map00052+C00111+C00137+C00029+C00116+C00052+C01613+C05402+C00243</a> |

---

|                                    |                                                                                                                                                                                                                                                 |
|------------------------------------|-------------------------------------------------------------------------------------------------------------------------------------------------------------------------------------------------------------------------------------------------|
| UDP-D-Galactose                    | <a href="http://www.kegg.jp/kegg-bin/show_pathway?map00052+C00111+C00137+C00029+C00116+C00052+C01613+C05402+C00243">http://www.kegg.jp/kegg-bin/show_pathway?map00052+C00111+C00137+C00029+C00116+C00052+C01613+C05402+C00243</a>               |
| Acetylcarnitine                    | <a href="http://www.kegg.jp/kegg-bin/show_pathway?map04931+C02571+C00043">http://www.kegg.jp/kegg-bin/show_pathway?map04931+C02571+C00043</a>                                                                                                   |
| cis-Aconitate                      | <a href="http://www.kegg.jp/kegg-bin/show_pathway?map00020+C00158+C00417">http://www.kegg.jp/kegg-bin/show_pathway?map00020+C00158+C00417</a>                                                                                                   |
| Pregnenolone                       | <a href="http://www.kegg.jp/kegg-bin/show_pathway?map00140+C18044+C01953">http://www.kegg.jp/kegg-bin/show_pathway?map00140+C18044+C01953</a>                                                                                                   |
| Uracil                             | <a href="http://www.kegg.jp/kegg-bin/show_pathway?map00240+C00178+C00299+C00105+C00029+C00106+C00214+C00064+C00526+C00015">http://www.kegg.jp/kegg-bin/show_pathway?map00240+C00178+C00299+C00105+C00029+C00106+C00214+C00064+C00526+C00015</a> |
| N-Acetyl-D-glucosamine             | <a href="http://www.kegg.jp/kegg-bin/show_pathway?map00520+C00191+C00446+C00029+C02336+C00167+C00140+C00052">http://www.kegg.jp/kegg-bin/show_pathway?map00520+C00191+C00446+C00029+C02336+C00167+C00140+C00052</a>                             |
| Trigonelline                       | <a href="http://www.kegg.jp/kegg-bin/show_pathway?map00760+C00253+C00003+C00111+C01004+C05842">http://www.kegg.jp/kegg-bin/show_pathway?map00760+C00253+C00003+C00111+C01004+C05842</a>                                                         |
| Oleate                             | <a href="http://www.kegg.jp/kegg-bin/show_pathway?map01040+C01595+C00712">http://www.kegg.jp/kegg-bin/show_pathway?map01040+C01595+C00712</a>                                                                                                   |
| Linolenate                         | <a href="http://www.kegg.jp/kegg-bin/show_pathway?map01040+C01595+C00712">http://www.kegg.jp/kegg-bin/show_pathway?map01040+C01595+C00712</a>                                                                                                   |
| Tyramine                           | <a href="http://www.kegg.jp/kegg-bin/show_pathway?map00350+C00082+C00483">http://www.kegg.jp/kegg-bin/show_pathway?map00350+C00082+C00483</a>                                                                                                   |
| L-Tyrosine                         | <a href="http://www.kegg.jp/kegg-bin/show_pathway?map00350+C00082+C00483">http://www.kegg.jp/kegg-bin/show_pathway?map00350+C00082+C00483</a>                                                                                                   |
| N2-Acetyl-L-ornithine              | <a href="http://www.kegg.jp/kegg-bin/show_pathway?map00220+C00025+C00437+C00064">http://www.kegg.jp/kegg-bin/show_pathway?map00220+C00025+C00437+C00064</a>                                                                                     |
| L-Phenylalanine                    | <a href="http://www.kegg.jp/kegg-bin/show_pathway?map00360+C00180+C00079+C00082">http://www.kegg.jp/kegg-bin/show_pathway?map00360+C00180+C00079+C00082</a>                                                                                     |
| D-Lactose                          | <a href="http://www.kegg.jp/kegg-bin/show_pathway?map00052+C00137+C00446+C00029+C00111+C00243+C00052+C05402">http://www.kegg.jp/kegg-bin/show_pathway?map00052+C00137+C00446+C00029+C00111+C00243+C00052+C05402</a>                             |
| Uridine                            | <a href="http://www.kegg.jp/kegg-bin/show_pathway?map00240+C00178+C00299+C00105+C00029+C00106+C00214+C00064+C00526+C00015">http://www.kegg.jp/kegg-bin/show_pathway?map00240+C00178+C00299+C00105+C00029+C00106+C00214+C00064+C00526+C00015</a> |
| Inosine                            | <a href="http://www.kegg.jp/kegg-bin/show_pathway?map00230+C00294+C00385+C00064+C00262">http://www.kegg.jp/kegg-bin/show_pathway?map00230+C00294+C00385+C00064+C00262</a>                                                                       |
| N1-Methyl-2-pyridone-5-carboxamide | <a href="http://www.kegg.jp/kegg-bin/show_pathway?map00760+C00253+C00003+C00111+C01004+C05842">http://www.kegg.jp/kegg-bin/show_pathway?map00760+C00253+C00003+C00111+C01004+C05842</a>                                                         |
| Lumichrome                         | <a href="http://www.kegg.jp/kegg-bin/show_pathway?map00740+C01727">http://www.kegg.jp/kegg-bin/show_pathway?map00740+C01727</a>                                                                                                                 |
| Glycerophosphocholine              | <a href="http://www.kegg.jp/kegg-bin/show_pathway?map00564+C00588+C01233+C00346+C00093+C00111+C00670">http://www.kegg.jp/kegg-bin/show_pathway?map00564+C00588+C01233+C00346+C00093+C00111+C00670</a>                                           |
| Pregnenolone                       | <a href="http://www.kegg.jp/kegg-bin/show_pathway?map00140+C18044+C01953">http://www.kegg.jp/kegg-bin/show_pathway?map00140+C18044+C01953</a>                                                                                                   |

---

**Supplemental Table 3. The hyperlink information of metabolites that differed in serum of offspring piglets aged 21 days between CON and L-Ser groups**

| Metabolites                             | URL-Info                                                                                                                                                                                                                          |
|-----------------------------------------|-----------------------------------------------------------------------------------------------------------------------------------------------------------------------------------------------------------------------------------|
| Cytosine                                | <a href="http://www.kegg.jp/kegg-bin/show_pathway?map00240+C00299+C00214+C00526+C00106+C00178+C00380+C00475+C00086">http://www.kegg.jp/kegg-bin/show_pathway?map00240+C00299+C00214+C00526+C00106+C00178+C00380+C00475+C00086</a> |
| Uridine                                 | <a href="http://www.kegg.jp/kegg-bin/show_pathway?map00240+C00299+C00214+C00526+C00106+C00178+C00380+C00475+C00086">http://www.kegg.jp/kegg-bin/show_pathway?map00240+C00299+C00214+C00526+C00106+C00178+C00380+C00475+C00086</a> |
| Hypoxanthine                            | <a href="http://www.kegg.jp/kegg-bin/show_pathway?map00230+C00262+C00086">http://www.kegg.jp/kegg-bin/show_pathway?map00230+C00262+C00086</a>                                                                                     |
| Uracil                                  | <a href="http://www.kegg.jp/kegg-bin/show_pathway?map00240+C00299+C00214+C00526+C00106+C00178+C00380+C00475+C00086">http://www.kegg.jp/kegg-bin/show_pathway?map00240+C00299+C00214+C00526+C00106+C00178+C00380+C00475+C00086</a> |
| Cytidine                                | <a href="http://www.kegg.jp/kegg-bin/show_pathway?map00240+C00299+C00214+C00526+C00106+C00178+C00380+C00475+C00086">http://www.kegg.jp/kegg-bin/show_pathway?map00240+C00299+C00214+C00526+C00106+C00178+C00380+C00475+C00086</a> |
| Thymine                                 | <a href="http://www.kegg.jp/kegg-bin/show_pathway?map00240+C00299+C00214+C00526+C00106+C00178+C00380+C00475+C00086">http://www.kegg.jp/kegg-bin/show_pathway?map00240+C00299+C00214+C00526+C00106+C00178+C00380+C00475+C00086</a> |
| L-Pyroglutamate                         | <a href="http://www.kegg.jp/kegg-bin/show_pathway?map00480+C00025+C01879">http://www.kegg.jp/kegg-bin/show_pathway?map00480+C00025+C01879</a>                                                                                     |
| L-Glutamate                             | <a href="http://www.kegg.jp/kegg-bin/show_pathway?map05033+C00025">http://www.kegg.jp/kegg-bin/show_pathway?map05033+C00025</a>                                                                                                   |
| Dopamine                                | <a href="http://www.kegg.jp/kegg-bin/show_pathway?map00350+C03758">http://www.kegg.jp/kegg-bin/show_pathway?map00350+C03758</a>                                                                                                   |
| Betaine                                 | <a href="http://www.kegg.jp/kegg-bin/show_pathway?map00260+C00719">http://www.kegg.jp/kegg-bin/show_pathway?map00260+C00719</a>                                                                                                   |
| L-Leucine                               | <a href="http://www.kegg.jp/kegg-bin/show_pathway?map04150+C00123">http://www.kegg.jp/kegg-bin/show_pathway?map04150+C00123</a>                                                                                                   |
| Taurine                                 | <a href="http://www.kegg.jp/kegg-bin/show_pathway?map00430+C00025+C00245">http://www.kegg.jp/kegg-bin/show_pathway?map00430+C00025+C00245</a>                                                                                     |
| Anthranilate                            | <a href="http://www.kegg.jp/kegg-bin/show_pathway?map00380+C00322+C00108">http://www.kegg.jp/kegg-bin/show_pathway?map00380+C00322+C00108</a>                                                                                     |
| Glycerophosphocholine                   | <a href="http://www.kegg.jp/kegg-bin/show_pathway?map00564+C00670">http://www.kegg.jp/kegg-bin/show_pathway?map00564+C00670</a>                                                                                                   |
| 1-Stearoyl-sn-glycerol 3-phosphocholine | <a href="http://www.kegg.jp/kegg-bin/show_pathway?map00564+C00670">http://www.kegg.jp/kegg-bin/show_pathway?map00564+C00670</a>                                                                                                   |
| N1-Methyl-2-pyridone-5-carboxamide      | <a href="http://www.kegg.jp/kegg-bin/show_pathway?map00564+C00670">http://www.kegg.jp/kegg-bin/show_pathway?map00564+C00670</a>                                                                                                   |
| Cholate                                 | <a href="http://www.kegg.jp/kegg-bin/show_pathway?map00120+C00695+C01921+C00245+C05466">http://www.kegg.jp/kegg-bin/show_pathway?map00120+C00695+C01921+C00245+C05466</a>                                                         |

---

Glycocholate

[http://www.kegg.jp/kegg-bin/show\\_pathway?map00120+C00695+C01921+C00245+C05466](http://www.kegg.jp/kegg-bin/show_pathway?map00120+C00695+C01921+C00245+C05466)

---
